# Supplementary material
Source: Research Square preprint supplement (doi:10.21203/rs.3.rs-9989707/v1)
Supplement: Supplementary file 1 [file 8be0f8383d6093ad5dab7333.docx]

**Children in the Heat: Assessing the Multidimensional Impacts of Heatwaves and Policy Gaps in South India**

Supplementary.

Source: Fieldwork

**Table 1: The details of the sample size are given below.**

| **S.No.** | **Name of the State** | **Sample size** |
| --- | --- | --- |
| 1. | Andhra Pradesh | 300 |
| 2. | Odisha | 300 |
| 3. | Pondicherry | 300 |
| 4. | Tamil Nadu | 300 |
| 5. | Kerala | 300 |
|  | **Total** | **1500** |

**Table 2: Gender wise sample size**

| **Name of the State** | **Male (N)** | | **Female (N)** | | **Total** | |
| --- | --- | --- | --- | --- | --- | --- |
| **Frequency** | **Percentage** | **Frequency** | **Percentage** | **Frequency** | **Percentage** |
| Andhra Pradesh | 107 | 36 | 193 | 64 | 300 | 100 |
| Odisha | 157 | 52 | 143 | 48 | 300 | 100 |
| Pondicherry | 153 | 51 | 147 | 49 | 300 | 100 |
| Tamil Nadu | 114 | 38 | 186 | 62 | 300 | 100 |
| Kerala | 67 | 22 | 233 | 78 | 300 | 100 |
| **Total** | **598** | **40** | **902** | **60** | **1500** | **100** |

**Table 3: Age category wise respondents**

| **Age category** | **N** | **Percentage** |
| --- | --- | --- |
| Adolescents category (13-18 years) | 496 | 33 |
| Early Childhood (3-5 years) | 338 | 23 |
| Childhood (6-12 years) | 335 | 22 |
| Infants (0-2 years) | 187 | 12 |
| Prenatal/Pregnancy group | 144 | 10 |
| **Total** | **1500** | **100** |

**Table 4: Domicile-wise distribution of the sample in the study.**

| **Domicile** | **N** | **Percentage** |
| --- | --- | --- |
| Rural | 1178 | 79 |
| Urban | 322 | 21 |
| **Total** | **1500** | **100** |

**Table 5: Economic status-wise distribution of the sample.**

| **Economic Status** | **N** | **Percentage** |
| --- | --- | --- |
| Antyodaya Anna Yojana | 131 | 9 |
| Below Poverty Line | 990 | 66 |
| Above Poverty Line | 379 | 25 |
| **Total** | **1500** | **100** |

**Table 6: Distribution of the sample based on the type of housing.**

| **Type of housing** | **N** | **Percentage** |
| --- | --- | --- |
| Pakka houses permanent structures typically made of durable  materials such as brick, cement, and concrete | 966 | 64 |
| Kachha  houses, which are temporary or semi-permanent structures often made of mud, thatch, bamboo, or  other non-durable materials. | 534 | 36 |
| **Total** | **1500** | **100** |

**Table 7: Types of heat illness experienced by children**

| **Dehydration** | | | | | | |
| --- | --- | --- | --- | --- | --- | --- |
| **State/ UT** | **Yes** | | **No** | | **Total** | |
| **N** | **Percentage** | **N** | **Percentage** | **N** | **Percentage** |
| Andhra Pradesh | 111 | 37 | 189 | 63 | 300 | 100 |
| Odisha | 37 | 12 | 263 | 88 | 300 | 100 |
| Tamil Nadu | 75 | 25 | 225 | 75 | 300 | 100 |
| Pondicherry | 9 | 3 | 291 | 97 | 300 | 100 |
| Kerala | 14 | 5 | 286 | 95 | 300 | 100 |
| **Total** | **246** | **16** | **1254** | **84** | **1500** | **100** |
| **Heat Exhaustion** | | | | | | |
| **State/ UT** | **Yes** | **No** | **Total** |  |  |  |
| **N** | **Percentage** | **N** | **Percentage** | **N** | **Percentage** |
| Andhra Pradesh | 76 | 25 | 224 | 75 | 300 | 100 |
| Odisha | 9 | 3 | 291 | 97 | 300 | 100 |
| Tamil Nadu | 97 | 32 | 203 | 68 | 300 | 100 |
| Pondicherry | 14 | 5 | 286 | 95 | 300 | 100 |
| Kerala | 21 | 7 | 279 | 93 | 300 | 100 |
| **Total** | **217** | **15** | **1283** | **85** | **1500** | **100** |
| **Heat cramps** | | | | | | |
| **State/ UT** | **Yes** | **No** | **Total** |  |  |  |
| **N** | **Percentage** | **N** | **Percentage** | **N** | **Percentage** |
| Andhra Pradesh | 120 | 40 | 180 | 60 | 300 | 10 |
| Odisha | 27 | 9 | 273 | 91 | 300 | 100 |
| Tamil Nadu | 30 | 10 | 270 | 90 | 300 | 100 |
| Pondicherry | 19 | 6 | 281 | 94 | 300 | 100 |
| Kerala | 24 | 8 | 276 | 92 | 300 | 100 |
| **Total** | **220** | **15** | **1280** | **85** | **1500** | **100** |
| **Heat Stroke** | | | | | | |
| **State/ UT** | **Yes** | **No** | **Total** |  |  |  |
| **N** | **Percentage** | **N** | **Percentage** | **N** | **Percentage** |
| Andhra Pradesh | 105 | 35 | 195 | 65 | 300 | 100 |
| Odisha | 68 | 23 | 232 | 77 | 300 | 100 |
| Tamil Nadu | 13 | 4 | 287 | 96 | 300 | 100 |
| Pondicherry | 5 | 2 | 295 | 98 | 300 | 100 |
| Kerala | 10 | 3 | 290 | 97 | 300 | 100 |
| Total | 201 | 13 | 1299 | 87 | 1500 | 100 |
| **Heat Rash** | | | | | | |
| **State/ UT** | **Yes** | **No** | **Total** |  |  |  |
| **N** | **Percentage** | **N** | **Percentage** | **N** | **Percentage** |
| Andhra Pradesh | 50 | 17 | 250 | 83 | 300 | 100 |
| Odisha | 36 | 12 | 264 | 88 | 300 | 100 |
| Tamil Nadu | 31 | 10 | 269 | 90 | 300 | 100 |
| Pondicherry | 29 | 10 | 271 | 90 | 300 | 100 |
| Kerala | 37 | 12 | 263 | 88 | 300 | 100 |
| **Total** | **183** | **12** | **1317** | **88** | **1500** | **100** |
| **Sunburn** | | | | | | |
| **State/ UT** | **Yes** | **No** | **Total** |  |  |  |
| **N** | **Percentage** | **N** | **Percentage** | **N** | **Percentage** |
| Andhra Pradesh | 55 | 18 | 245 | 82 | 300 | 100 |
| Odisha | 41 | 14 | 259 | 86 | 300 | 100 |
| Tamil Nadu | 9 | 3 | 291 | 97 | 300 | 100 |
| Pondicherry | 8 | 3 | 292 | 97 | 300 | 100 |
| Kerala | 25 | 8 | 275 | 92 | 300 | 100 |
| **Total** | **138** | **9** | **1362** | **91** | **1500** | **100** |
| **Other Heat Related Illness** | | | | | | |
| **State/ UT** | **Yes** | **No** | **Total** |  |  |  |
| **N** | **Percentage** | **N** | **Percentage** | **N** | **Percentage** |
| Andhra Pradesh | 14 | 5 | 286 | 95 | 300 | 100 |
| Odisha | 9 | 3 | 291 | 97 | 300 | 100 |
| Tamil Nadu | 5 | 2 | 295 | 98 | 300 | 100 |
| Pondicherry | 31 | 10 | 269 | 90 | 300 | 100 |
| Kerala | 16 | 5 | 284 | 95 | 300 | 100 |
| **Total** | **75** | **5** | **1425** | **95** | **1500** | **100** |

**Table 8: Anxiety**

| **State/UT** | **Yes (Freq)** | **Yes (%)** | **No (Freq)** | **No (%)** | **Total (Freq)** | **Total (%)** |
| --- | --- | --- | --- | --- | --- | --- |
| Andhra Pradesh | 115 | 38 | 185 | 62 | 300 | 100 |
| Odisha | 57 | 19 | 243 | 81 | 300 | 100 |
| Tamil Nadu | 14 | 5 | 286 | 95 | 300 | 100 |
| Puducherry | 16 | 5 | 284 | 95 | 300 | 100 |
| Kerala | 23 | 8 | 277 | 92 | 300 | 100 |
| **Total** | **225** | **15** | **1275** | **85** | **1500** | **100** |

**Table 9: Stress**

| **State/UT** | **Yes (Freq)** | **Yes (%)** | **No (Freq)** | **No (%)** | **Total (Freq)** | **Total (%)** |
| --- | --- | --- | --- | --- | --- | --- |
| Andhra Pradesh | 72 | 24 | 228 | 76 | 300 | 100 |
| Odisha | 49 | 16 | 251 | 84 | 300 | 100 |
| Tamil Nadu | 23 | 8 | 277 | 92 | 300 | 100 |
| Puducherry | 22 | 7 | 278 | 93 | 300 | 100 |
| Kerala | 64 | 21 | 236 | 79 | 300 | 100 |
| **Total** | **230** | **15** | **1270** | **85** | **1500** | **100** |

**Table 10: Poor Sleep**

| **State/UT** | **Yes (Freq)** | **Yes (%)** | **No (Freq)** | **No (%)** | **Total (Freq)** | **Total (%)** |
| --- | --- | --- | --- | --- | --- | --- |
| Andhra Pradesh | 28 | 9 | 272 | 91 | 300 | 100 |
| Odisha | 50 | 17 | 250 | 83 | 300 | 100 |
| Tamil Nadu | 79 | 26 | 221 | 74 | 300 | 100 |
| Puducherry | 90 | 30 | 210 | 70 | 300 | 100 |
| Kerala | 95 | 32 | 205 | 68 | 300 | 100 |
| **Total** | **342** | **23** | **1158** | **77** | **1500** | **100** |

**Table 11: Irritation**

| **State/UT** | **Yes (Freq)** | **Yes (%)** | **No (Freq)** | **No (%)** | **Total (Freq)** | **Total (%)** |
| --- | --- | --- | --- | --- | --- | --- |
| Andhra Pradesh | 44 | 15 | 256 | 85 | 300 | 100 |
| Odisha | 33 | 11 | 267 | 89 | 300 | 100 |
| Tamil Nadu | 18 | 6 | 282 | 94 | 300 | 100 |
| Puducherry | 44 | 15 | 256 | 85 | 300 | 100 |
| Kerala | 28 | 9 | 272 | 91 | 300 | 100 |
| **Total** | **167** | **11** | **1333** | **89** | **1500** | **100** |

**Table 12: Reduced Patience and Irritation**

| **State/UT** | **Yes (Freq)** | **Yes (%)** | **No (Freq)** | **No (%)** | **Total (Freq)** | **Total (%)** |
| --- | --- | --- | --- | --- | --- | --- |
| Andhra Pradesh | 9 | 3 | 291 | 97 | 300 | 100 |
| Odisha | 5 | 2 | 295 | 98 | 300 | 100 |
| Tamil Nadu | 4 | 1 | 296 | 99 | 300 | 100 |
| Puducherry | 5 | 2 | 295 | 98 | 300 | 100 |
| Kerala | 4 | 1 | 296 | 99 | 300 | 100 |
| **Total** | **27** | **2** | **1473** | **98** | **1500** | **100** |

**Table 13: Impact on academic performance**

| **State/UT** | **Yes (Freq)** | **Yes (%)** | **No (Freq)** | **No (%)** | **Total (Freq)** | **Total (%)** |
| --- | --- | --- | --- | --- | --- | --- |
| Andhra Pradesh | 93 | 31 | 52 | 17 | 300 | 100 |
| Odisha | 20 | 7 | 88 | 29 | 300 | 100 |
| Tamil Nadu | 73 | 24 | 104 | 35 | 300 | 100 |
| Pondicherry | 55 | 18 | 140 | 47 | 300 | 100 |
| Kerala | 90 | 30 | 114 | 38 | 300 | 100 |
| **Total** | **331** | **22** | **498** | **33** | **1500** | **100** |

**Table 14: Impact on children’s ability to focus and learn**

| **Impact Category** | **Frequency** | **Percent** |
| --- | --- | --- |
| They significantly reduce focus and learning ability | 325 | 22 |
| They somewhat reduce focus and learning ability | 551 | 37 |
| They have no effect on focus and learning ability | 224 | 15 |
| They improve focus and learning ability | 69 | 5 |
| **Total** | **1500** | **100** |

**Table 15: Measures taken to mitigate the impact of heat waves on education at local level**

| **Measure** | **Frequency** | **Percent** |
| --- | --- | --- |
| Adjusting school hours | 541 | 36 |
| Providing cooling infrastructure | 562 | 38 |
| Conducting heat awareness programs | 315 | 21 |
| Ensuring regular hydration | 345 | 23 |
| Shutting down schools during extreme heat days | 45 | 3 |
| No measures are taken | 59 | 4 |
| **Total** | **1500** | **100** |

**Table 16: Adjustments made to children's daily routines**

| **Type of Adjustment** | **Frequency** | **Percent** |
| --- | --- | --- |
| Reducing outdoor activities | 612 | 41 |
| Modifying school hours or schedules | 307 | 21 |
| Increasing indoor time and hydration | 124 | 8 |
| Shifting activities to the cooler part of the day | 49 | 3 |
| No adjustments are made | 77 | 5 |
| **Total** | **1500** | **100** |

**Table 17: Access to fresh vegetables**

| **State/UT** | **Yes (Freq)** | **Yes (%)** | **No (Freq)** | **No (%)** | **Total (Freq)** | **Total (%)** |
| --- | --- | --- | --- | --- | --- | --- |
| Andhra Pradesh | 230 | 77 | 70 | 23 | 300 | 100 |
| Odisha | 142 | 47 | 158 | 53 | 300 | 100 |
| Tamil Nadu | 56 | 19 | 244 | 81 | 300 | 100 |
| Puducherry | 209 | 70 | 91 | 30 | 300 | 100 |
| Kerala | 172 | 57 | 128 | 43 | 300 | 100 |
| **Total** | **809** | **54** | **691** | **46** | **1500** | **100** |

**Table 18: Impact of heat waves on access to nutritious food (fresh vegetables)**

| **Impact Category** | **Frequency** | **Percent** |
| --- | --- | --- |
| Access significantly decreases | 358 | 24 |
| Access slightly decreases | 462 | 31 |
| Access remains unchanged | 281 | 19 |
| Access improves during heat waves | 168 | 11 |
| Not sure / No noticeable impact | 231 | 15 |
| **Total** | **1500** | **100** |
